# Supplementary material for: How does perceived heat stress differ between urban forms and human vulnerability profiles? – case study Berlin
Source: Copernicus journal article supplement (doi:10.5194/egusphere-2024-1907), 2024-07-01
Supplement: Supplementary file 1 [file egusphere-2024-1907-supplement.pdf]

|    |                                                                                                              |          |
|----|--------------------------------------------------------------------------------------------------------------|----------|
| 1  | <b>Contents</b>                                                                                              |          |
| 2  | <b>General</b> .....                                                                                         | <b>2</b> |
| 3  | <b>File types in dataset</b> .....                                                                           | <b>2</b> |
| 4  | <b>S1 Aggregation of urban structure types (USTs) related to residential use in the City of Berlin</b> ..... | <b>3</b> |
| 5  | S1.1 Dataset files.....                                                                                      | 3        |
| 6  | S1.2 Data purpose.....                                                                                       | 3        |
| 7  | S1.3 Data generation.....                                                                                    | 3        |
| 8  | S1.4 Data description .....                                                                                  | 3        |
| 9  | <b>S2 Household survey data</b> .....                                                                        | <b>5</b> |
| 10 | S2.1 Dataset files.....                                                                                      | 5        |
| 11 | S2.2 Data purpose.....                                                                                       | 5        |
| 12 | S2.3 Data generation.....                                                                                    | 6        |
| 13 | S2.4 Data description .....                                                                                  | 6        |
| 14 | S2.5 Cross-tabulation of variables from household survey.....                                                | 6        |
| 15 | <b>S3 Earth observation (EO) data processing</b> .....                                                       | <b>8</b> |
| 16 | S3.1 Dataset files.....                                                                                      | 8        |
| 17 | S3.2 Data purpose.....                                                                                       | 8        |
| 18 | S3.3 Data generation.....                                                                                    | 8        |
| 19 | S3.4 Data description .....                                                                                  | 8        |
| 20 | <b>References</b> .....                                                                                      | <b>9</b> |
| 21 |                                                                                                              |          |

## 22 General

23 This document provides a comprehensive overview of dataset components of the household survey and earth  
 24 observation data used for analysing perceived heat stress in different urban structure types (USTs) and in 39  
 25 selected PLRs (Fig. S2) for household survey in Berlin. It is a companion document to the main article that serves  
 26 as a detailed reference for the data contents archived.

27 In the following, each dataset component (Table 1, Table 2 and Table 3 in the main paper) is discussed in its own  
 28 section. Each section includes:

- 29 1) Overview of files included in the Zenodo archive.
- 30 2) Purpose of the dataset.
- 31 3) Data generation steps.
- 32 4) Detailed dataset description with meta information for all files provided.

33  
 34 Iqbal, N., Ravan, M., Mitraka, Z., Birkmann, J., Grimmond, S., Hertwig, D., Chrysoulakis, N.,  
 35 Somarakis, G., & Wendnagel-Beck, A. (2024). Datasets for: How does perceived heat stress differ  
 36 between urban forms and human vulnerability profiles? – case study Berlin [Data set]. Zenodo.  
 37 10.5281/zenodo.12192376

## 38 File types in dataset

39 File types of the datasets provided are described in Table S0.1

40  
 41 *Table S0.1: File formats used with descriptions and references. Links last accessed on 18/06/2024.*

| File ending / format                 | Description              | Reference                                                                                                                                               |
|--------------------------------------|--------------------------|---------------------------------------------------------------------------------------------------------------------------------------------------------|
| *.zip                                | File compression         | <a href="https://www.loc.gov/preservation/digital/formats/fdd/fdd000354.shtml">https://www.loc.gov/preservation/digital/formats/fdd/fdd000354.shtml</a> |
| *.shp, *.shx, *.cpg,<br>*.dbf, *.prj | ESRI Shapefile           | <a href="https://www.loc.gov/preservation/digital/formats/fdd/fdd000280.shtml">https://www.loc.gov/preservation/digital/formats/fdd/fdd000280.shtml</a> |
| *.csv                                | Comma Separated Values   | <a href="https://www.loc.gov/preservation/digital/formats/fdd/fdd000323.shtml">https://www.loc.gov/preservation/digital/formats/fdd/fdd000323.shtml</a> |
| *.xlsx                               | Office Open XML          | <a href="https://www.loc.gov/preservation/digital/formats/fdd/fdd000398.shtml">https://www.loc.gov/preservation/digital/formats/fdd/fdd000398.shtml</a> |
| *.pdf                                | Portable Document Format | <a href="https://www.loc.gov/preservation/digital/formats/fdd/fdd000030.shtml">https://www.loc.gov/preservation/digital/formats/fdd/fdd000030.shtml</a> |

42

## 43 S1 Aggregation of urban structure types (USTs) related to residential use in the City of Berlin

### 44 S1.1 Dataset files

45 *Table S1.1: Files in Zenodo archive.*

| Compressed File                  | File types                                                                         | General description                                      | Details           |
|----------------------------------|------------------------------------------------------------------------------------|----------------------------------------------------------|-------------------|
| USTs_residential_new_classes.zip | Polygons, ESRI shapefile format (zipped: *.shp, *.shx, *.sbn, *.cpg, *.dbf, *.prj) | USTs in Berlin with 7 aggregated residential new classes | Tables S1.3, S1.4 |

### 46 S1.2 Data purpose

47 13 USTs in Berlin related to residential use are further aggregated into 7 classes (Fig. S1). The new classification (Table 1,  
48 main paper) ensures that USTs are sufficiently different, but also encompass a reduced number of classes that can be used  
49 within further assessment. The criteria were based on various physical and demographic parameters. Table A1 in the main  
50 paper presents detailed criteria used for this aggregation.

### 51 S1.3 Data generation

52 The USTs aggregation used ArcGIS pro<sup>1</sup> version 3.1.1.

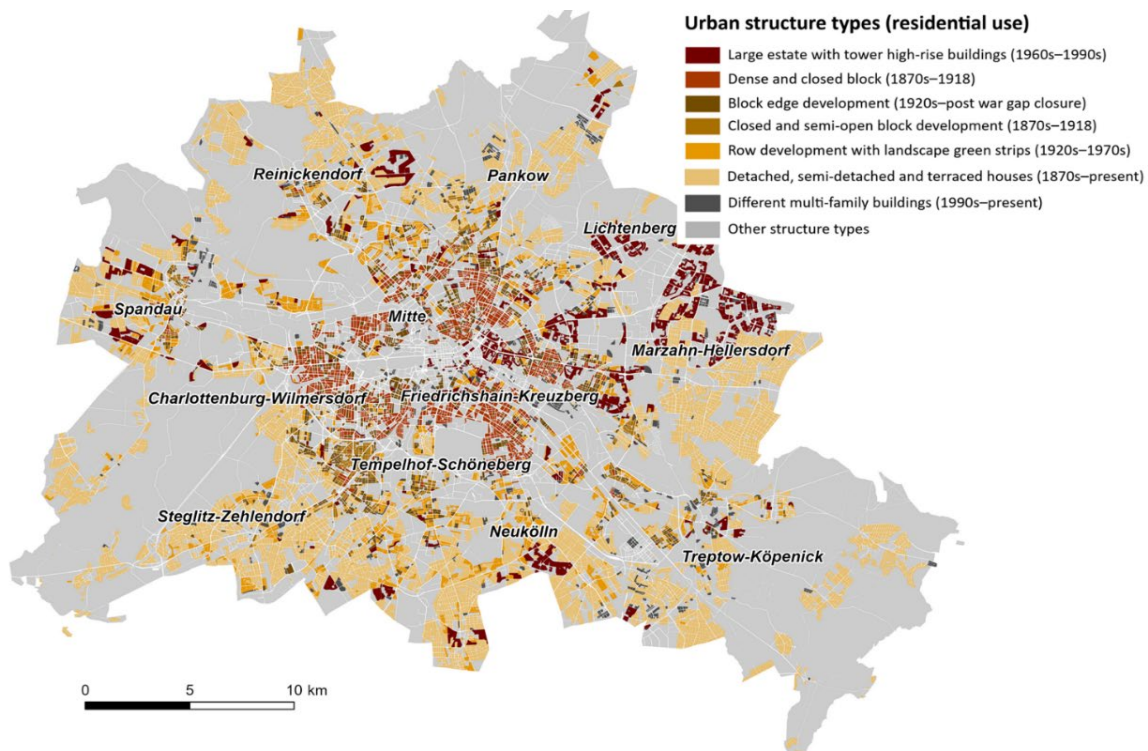

53

54 Figure S1: Urban structure types (USTs) residential new aggregated classes in Berlin using the data from Senatsverwaltung  
55 für Stadtentwicklung und Wohnen (2021)

#### 56 Input files

57 Input data used in the production of this dataset are listed in Table S1.2.

58 *Table S1.2: Data source used to aggregate USTs (Tables S1.4 and S1.5).*

|                       | Source             | Resolution | Reference year |
|-----------------------|--------------------|------------|----------------|
| Urban structure types | Umweltatlas Berlin | Block      | 2021           |

### 59 S1.4 Data description

60 File formats and further meta information are given in Table S1.3, data attributes in Table S1.4.

61

62

<sup>1</sup> <https://www.esri.com/en-us/arcgis/products/arcgis-pro/resources>, last accessed 20/03/2024

63 **Table S1.3:** Files formats and meta information for the dataset.

|                             |                                                                        |
|-----------------------------|------------------------------------------------------------------------|
| Filename(s)                 | USTs_residential_new_classes.shp and *.shx, *.sbn, *.cpg, *.dbf, *.prj |
| Coordinate reference system | EPSG 25833; ETRS89 / UTM zone 33N                                      |
| Format, type                | ESRI shapefile; polygons                                               |
| Resolution                  | Block                                                                  |
| Reference year              | 2021                                                                   |
| Dataset attributes          | Table S1.4                                                             |

64 **Table S1.4:** Dataset (Table S1.3) attributes.

| Attribute name    | Unit           | Type   | Description                             |
|-------------------|----------------|--------|-----------------------------------------|
| <i>Schl5</i>      | –              | string | Unique ID of each block                 |
| <i>Typklar_EN</i> | –              | string | UST of the block                        |
| <i>SHAPE_Area</i> | m <sup>2</sup> | float  | Area of the block                       |
| <i>Typ_Klar_B</i> | –              | string | USTs new aggregated classes (Figure S1) |

65

66

67 **S2 Household survey data**68 **S2.1 Dataset files**69 *Table S2.1: Files in Zenodo archive.*

| File               | File type | General description                                                             | Details           |
|--------------------|-----------|---------------------------------------------------------------------------------|-------------------|
| Berlin_survey_data | *.xls     | Selected variables from the household survey in Berlin linked with USTs dataset | Tables S2.2, S2.3 |

70 **S2.2 Data purpose**

71 Primary data on perceived heat and climate adaptation were obtained from a household survey conducted in Berlin in October  
 72 2022. To capture diverse groups and behaviors of people, 39 out of 542 PLRs (Fig. S2) were selected for a household survey  
 73 in Berlin. The selection was based on multiple criteria such as heat exposure, population density, representation of different  
 74 age groups, unemployment levels, and heat mortality rate. A total of 10,000 addresses were collected from the Population  
 75 Register of Berlin, using stratified sampling. Survey invitations were posted to selected addresses, along with a QR code to  
 76 access the online survey conducted using the Evasys online tool (Evasys GmbH, 2021). A total of 565 respondents from 8,000  
 77 households received invitation letters. It is important to mention that one PLR (No 39) was excluded from the analysis due to  
 78 the small number of respondents.

79 The survey data provided insights into household perceptions and experiences regarding heat stress and their living conditions  
 80 such as housing typologies, availability and access to green spaces, and adaptation options. The analysis particularly focused  
 81 on the influence of sociodemographic characteristics (distinguished by age and income) and urban forms on risk perception,  
 82 experience, and climate change adaptation options to heat stress in the city of Berlin.

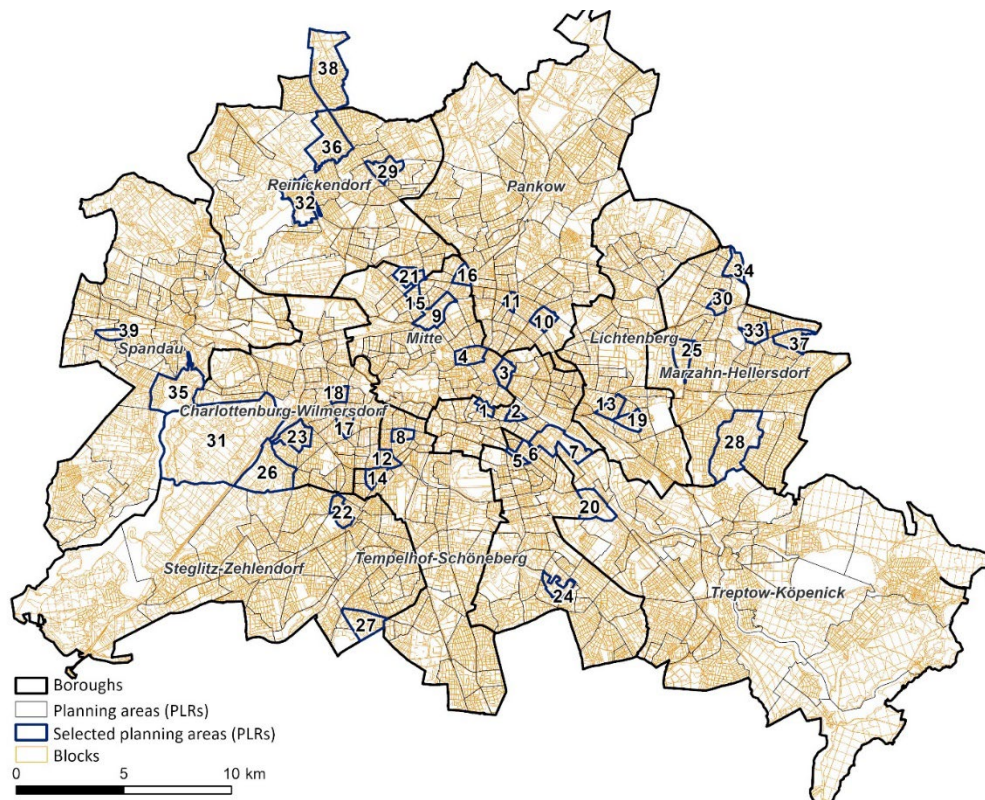

83

84 Fig. S2: Berlin (a) administrative boundaries showing city (outer line), Boroughs (black), PLRs (grey, planning areas), and  
 85 those selected for the household survey (blue, numbered 1 to 39) using data from Landesamt für Bürger- und  
 86 Ordnungsangelegenheiten, 2022

87 **S2.3 Data generation**

88 Household survey data was gathered using the online Evasys GmbH, 2021 tool. All processing done using IBM  
89 SPSS-29.0<sup>2</sup>. and R-2.15.0<sup>3</sup>.

90 **S2.4 Data description**

91 *Table S2.2: Files formats and meta information for the dataset.*

|                    |                                                                |
|--------------------|----------------------------------------------------------------|
| Filename(s)        | Berlin_survey_data.xls                                         |
| Format             | Excel                                                          |
| Resolution         | PLRs (Landesamt für Bürger- und Ordnungsangelegenheiten, 2022) |
| Reference year     | 2022                                                           |
| Dataset attributes | Table S2.3                                                     |

92 *Table S2.3: Aggregated dataset (Table SM2.5) attributes*

| Attribute name                  | Type    | Description                                                                                                                                                                            |                                                                            |
|---------------------------------|---------|----------------------------------------------------------------------------------------------------------------------------------------------------------------------------------------|----------------------------------------------------------------------------|
| Urban Structure Types (USTs)    | Nominal | Linked to the USTs (Fig. S1) below:                                                                                                                                                    |                                                                            |
|                                 |         | Large estate with tower high-rise buildings (1960s–1990s)                                                                                                                              | Dense and closed block (1870s–1918s)                                       |
|                                 |         | Block edge development (1920s–post war gap closure)                                                                                                                                    | Closed and semi-open block development (1870s–1918)                        |
|                                 |         | Row development with landscape green strips (1920 – 1970s)                                                                                                                             | Detached, semi-detached and terraced houses (1870s – present)              |
|                                 |         | Different multi-family buildings (1990s – present)                                                                                                                                     | Other structure types                                                      |
| Perceived heat at neighbourhood | Ordinal | How hot or cool do you think your neighbourhood is during a heatwave compared to the average outdoor temperature for the city?                                                         |                                                                            |
|                                 |         | Much cooler   Slightly cooler   No difference   Slightly hotter   Very hot                                                                                                             |                                                                            |
| Open spaces                     | Nominal | How would you describe the area right next to your house/apartment?                                                                                                                    |                                                                            |
|                                 |         | Lots of green (trees, meadow, lawn) and plenty of space between the buildings                                                                                                          | Lots of green (trees, meadow, lawn), but little space between buildings    |
|                                 |         | Little green (trees, meadow, lawn) and a lot of space between the buildings                                                                                                            | Little green (trees, meadow, lawn), and little space between the buildings |
|                                 |         | None of this applies to my living environment                                                                                                                                          |                                                                            |
| Age group                       | Ordinal | How old are you?                                                                                                                                                                       |                                                                            |
|                                 |         | 18 to 24 years   25 to 34 years   35 to 44 years   45 to 54 years                                                                                                                      |                                                                            |
|                                 |         | 55 to 64 years   65 to 74 years   75 to 84 years   85 years and older                                                                                                                  |                                                                            |
| Health Condition                | Nominal | Have you already had problems with heat stress? If yes, which ones:                                                                                                                    |                                                                            |
|                                 |         | Lethargy/fatigue   Trouble sleeping   Difficulties in concentrating   Dizziness                                                                                                        |                                                                            |
|                                 |         | Nausea   Cardiovascular problems   Heat stroke                                                                                                                                         |                                                                            |
| Household income                | Ordinal | What is the monthly net income (Netto) of the household? (Netto = after deduction of taxes, social security contributions, etc.)                                                       |                                                                            |
|                                 |         | Less than 900 €   900 to under 1300 €   1300 to under 1700 €                                                                                                                           |                                                                            |
|                                 |         | 1700 to under 2000 €   2000 to under 2300 €   2300 to under 2600 €                                                                                                                     |                                                                            |
|                                 |         | 2600 to under 2900 €   2900 to under 3200 €   3200 to under 3600 €                                                                                                                     |                                                                            |
|                                 |         | 3600 to under 4000 €   4000 to under 4500 €   4500 to under 5000 €                                                                                                                     |                                                                            |
|                                 |         | 5000 to under 6000 €   6000 to under 7000 €   7000 € and above                                                                                                                         |                                                                            |
|                                 |         | Not specified                                                                                                                                                                          |                                                                            |
| Adaptive measures               | Nominal | Which of the following measure to protect against heatwaves have you already implemented or are you planning to implement (considering the change of weather in Berlin, as described)? |                                                                            |
|                                 |         | Air conditioner installation                                                                                                                                                           |                                                                            |
|                                 |         | Already implemented   In plan/ implementation   Will be an option for future                                                                                                           |                                                                            |
|                                 |         | Neither today, nor future   Does not apply                                                                                                                                             |                                                                            |

93 **S2.5 Cross-tabulation of variables from household survey**

94 The percentage responses of perceived heat at neighbourhood and open spaces (description of the area next to  
95 house/apartment) are aggregated for 7 UST in the Table S2.4. The results from the cross-tabulation of different variables are  
96 reported in the paper in the section 3.2 and 3.3. Tables are provided as below:

<sup>2</sup> <https://www.ibm.com/spss>, last accessed 20/03/2024

<sup>3</sup> <https://www.r-studio.com/>, last accessed 20/03/2024



97 **Table S2.4: Urban Structure types, perceived heat and availability of open spaces**

| Original survey question number     | 5.3                                           |                 |               |                 |          | 9.1                                                                           |                                                                         |                                                                             |                                                                            |                                               |
|-------------------------------------|-----------------------------------------------|-----------------|---------------|-----------------|----------|-------------------------------------------------------------------------------|-------------------------------------------------------------------------|-----------------------------------------------------------------------------|----------------------------------------------------------------------------|-----------------------------------------------|
| 6.2                                 | % responses of perceived heat at neighborhood |                 |               |                 |          | % responses of description of the area right next to house/apartment?         |                                                                         |                                                                             |                                                                            |                                               |
| Urban structure types               | Very cool                                     | Slightly cooler | No difference | Slightly hotter | Very hot | Lots of green (trees, meadow, lawn) and plenty of space between the buildings | Lots of green (trees, meadow, lawn), but little space between buildings | Little green (trees, meadow, lawn) and a lot of space between the buildings | Little green (trees, meadow, lawn), and little space between the buildings | None of this applies to my living environment |
| (semi-)detached and terraced houses | 6.3%                                          | 56.3%           | 15.0%         | 17.5%           | 5.0%     | 77.2%                                                                         | 19.0%                                                                   | 1.3%                                                                        | 2.5%                                                                       | 0.0%                                          |
| Row development                     | 1.5%                                          | 36.8%           | 25.0%         | 25.0%           | 11.8%    | 44.1%                                                                         | 25.0%                                                                   | 2.9%                                                                        | 26.5%                                                                      | 1.5%                                          |
| Closed/ semi-open block development | 0.0%                                          | 40.0%           | 20.0%         | 35.0%           | 5.0%     | 21.1%                                                                         | 47.4%                                                                   | 15.8%                                                                       | 10.5%                                                                      | 5.3%                                          |
| Block edge development              | 0.0%                                          | 21.0%           | 32.7%         | 38.3%           | 8.0%     | 22.0%                                                                         | 34.0%                                                                   | 5.0%                                                                        | 36.5%                                                                      | 2.5%                                          |
| Multi-family buildings              | 0.0%                                          | 26.5%           | 32.7%         | 34.7%           | 6.1%     | 33.3%                                                                         | 28.9%                                                                   | 4.4%                                                                        | 28.9%                                                                      | 4.4%                                          |
| Dense closed block                  | 0.0%                                          | 9.8%            | 23.2%         | 43.9%           | 23.2%    | 11.1%                                                                         | 39.5%                                                                   | 8.6%                                                                        | 34.6%                                                                      | 6.2%                                          |
| High-rise buildings                 | 1.1%                                          | 22.6%           | 20.4%         | 37.6%           | 18.3%    | 56.2%                                                                         | 29.2%                                                                   | 6.7%                                                                        | 6.7%                                                                       | 1.1%                                          |

99 The percentage responses of perceived heat and heat-related health issues i.e. cardiovascular problems are cross-tabulated with  
100 different age groups (Table S2.5). Results are reported in the section 3.3.2 of the paper.

101 **Table S2.5: Age groups, perceived heat and cardiovascular issues**

| Original survey question number | 17.8                                          |                 |               |                 |          | 5.15                                   |       |           |        |       |
|---------------------------------|-----------------------------------------------|-----------------|---------------|-----------------|----------|----------------------------------------|-------|-----------|--------|-------|
| 14.1                            | % responses of perceived heat at neighborhood |                 |               |                 |          | % responses of cardiovascular problems |       |           |        |       |
| How old are you?                | Very cool                                     | Slightly cooler | No difference | Slightly hotter | Very hot | Very often                             | Often | Sometimes | Rarely | No    |
| 18-24 year                      | 0.0%                                          | 1.3%            | 2.2%          | 2.1%            | 3.1%     | 0.0%                                   | 3.0%  | 1.6%      | 1.2%   | 2.9%  |
| 25-34 year                      | 14.3%                                         | 13.0%           | 22.3%         | 17.3%           | 15.6%    | 16.1%                                  | 3.0%  | 10.5%     | 21.3%  | 20.1% |
| 35-44 year                      | 14.3%                                         | 13.0%           | 25.2%         | 17.8%           | 18.8%    | 25.8%                                  | 18.2% | 15.3%     | 14.0%  | 22.5% |
| 45-54 year                      | 0.0%                                          | 18.2%           | 15.1%         | 12.6%           | 12.5%    | 9.7%                                   | 9.1%  | 13.7%     | 15.9%  | 14.7% |
| 55-64 year                      | 28.6%                                         | 24.7%           | 20.1%         | 18.8%           | 20.3%    | 12.9%                                  | 27.3% | 26.6%     | 24.4%  | 15.2% |
| 65-74 year                      | 42.9%                                         | 20.8%           | 10.8%         | 20.9%           | 14.1%    | 19.4%                                  | 30.3% | 16.9%     | 14.6%  | 18.1% |
| 75-84 year                      | 0.0%                                          | 6.5%            | 3.6%          | 8.4%            | 15.6%    | 12.9%                                  | 3.0%  | 12.9%     | 6.7%   | 5.9%  |
| 85 year and above               | 0.0%                                          | 2.6%            | 0.7%          | 2.1%            | 0.0%     | 3.2%                                   | 6.1%  | 2.4%      | 1.8%   | 0.5%  |

103 The percentage responses of household monthly net income (€) are aggregated for 7 UST in the Table S2.6.1. and household  
104 monthly net income (€) is cross-tabulated with adaptation measure i.e., air conditioner installation (Table S2.6.2.). The results  
105 are reported in the section 3.3.2. of the paper.

106 **Table S2.6.1: Urban Structure type and household monthly net income**

| Original survey question number     | 17.8                                        |          |           |           |           |           |           |       |
|-------------------------------------|---------------------------------------------|----------|-----------|-----------|-----------|-----------|-----------|-------|
| 6.2                                 | % responses of household monthly net income |          |           |           |           |           |           |       |
| Urban structure types               | <900                                        | 900-1999 | 2000-2899 | 2900-3999 | 4000-4999 | 5000-5999 | 6000-6999 | ≥7000 |
| (semi-)detached and terraced houses | 0.0%                                        | 4.6%     | 10.8%     | 21.5%     | 24.6%     | 18.5%     | 0.0%      | 20.0% |
| Row development                     | 6.3%                                        | 12.7%    | 22.2%     | 23.8%     | 23.8%     | 7.9%      | 1.6%      | 1.6%  |
| Closed/ semi-open block development | 5.6%                                        | 0.0%     | 27.8%     | 16.7%     | 27.8%     | 11.1%     | 11.1%     | 0.0%  |
| Block edge development              | 1.4%                                        | 14.4%    | 24.0%     | 19.2%     | 20.5%     | 14.4%     | 2.1%      | 4.1%  |
| Multi-family buildings              | 4.5%                                        | 11.4%    | 13.6%     | 29.5%     | 15.9%     | 9.1%      | 4.5%      | 11.4% |
| Dense closed block                  | 1.4%                                        | 22.9%    | 7.1%      | 22.9%     | 18.6%     | 10.0%     | 5.7%      | 11.4% |
| High-rise buildings                 | 3.6%                                        | 21.4%    | 23.8%     | 21.4%     | 19.0%     | 9.5%      | 0.0%      | 1.2%  |

108 **Table S2.6.2: Household monthly net income and adaptation measures**

| Original survey question number | 17.8                                                                           |          |           |           |           |           |           |       |
|---------------------------------|--------------------------------------------------------------------------------|----------|-----------|-----------|-----------|-----------|-----------|-------|
| 12.4                            | % responses of household monthly net income vs installation of air conditioner |          |           |           |           |           |           |       |
| Air conditioner installation    | <900                                                                           | 900-1999 | 2000-2899 | 2900-3999 | 4000-4999 | 5000-5999 | 6000-6999 | ≥7000 |
| Already implemented             | 3.3%                                                                           | 10.0%    | 6.7%      | 26.7%     | 16.7%     | 20.0%     | 0.0%      | 16.7% |
| In plan/ implementation         | 0.0%                                                                           | 40.0%    | 20.0%     | 20.0%     | 20.0%     | 0.0%      | 0.0%      | 0.0%  |
| Will be an option for future    | 1.7%                                                                           | 6.8%     | 16.9%     | 23.7%     | 27.1%     | 3.4%      | 6.8%      | 13.6% |
| Neither today, nor future       | 3.0%                                                                           | 13.8%    | 17.2%     | 20.7%     | 22.4%     | 13.4%     | 2.6%      | 6.9%  |
| Does not apply                  | 3.4%                                                                           | 18.9%    | 20.9%     | 23.0%     | 16.9%     | 12.2%     | 1.4%      | 3.4%  |

109

110

111 **S3 Earth observation (EO) data processing**112 **S3.1 Dataset files**113 *Table S3.1: Files in Zenodo archive.*

| File                               | Compressed file types                                                              | General description                                                                   | Details           |
|------------------------------------|------------------------------------------------------------------------------------|---------------------------------------------------------------------------------------|-------------------|
| Grass_Trees_fraction_Block.zip     | Polygons, ESRI shapefile format (zipped: *.shp, *.shx, *.sbn, *.cpg, *.dbf, *.prj) | Plan area fraction of grass and trees per block (Fig. S2) covering the city of Berlin | Tables S3.3, S3.4 |
| Shadow_fraction_Block(Sel_PLR).zip | Polygons, ESRI shapefile format (zipped: *.shp, *.shx, *.sbn, *.cpg, *.dbf, *.prj) | Shadow fraction per block (Fig. S2) within survey PLR                                 | Tables S3.5, S3.6 |

114 **S3.2 Data purpose**

115 Shadow fraction and vegetation fraction are used to assess urban living conditions within Berlin. This data is then coupled  
116 with USTs and perceived heat stress.

117 **S3.3 Data generation**

118 Throughout the day, shadows create a distinctive solar loss pattern, with the longest shadows occurring during the early  
119 morning and evening hours and the shortest occurring around noon. Shadow length is influenced by the height and spacing of  
120 buildings and trees, which impacts surface radiative heating/cooling. In addition, vegetation cover affects the surface airflow  
121 and radiational heating/cooling through evapotranspiration (Marando et al., 2022). To facilitate the analysis, the shadow  
122 indicator, which represents the fraction of shadows (ranging from 0–1), was developed for the summer of 2022 (June 1–August  
123 31). Simulated hourly shadows for buildings and trees (Lindberg and Grimmond, 2011) during this period, at 1 m spatial  
124 resolution, were aggregated over time to estimate the shadow fraction for the entire summer.

125 The vegetation fraction, estimated at 10 m spatial resolution, used Sentinel-2 images for the summer of 2022 (Mitraka et al.,  
126 2017). Information on tree locations and heights at 1 m spatial resolution was obtained from local sources (Lindberg and  
127 Grimmond, 2011). Normalized difference vegetation index images were employed to assess low vegetation as well as overall  
128 vegetation abundance, resulting in a 10 m spatial resolution vegetation abundance image corresponding to summer months  
129 (June, July and August) 2022.

130 Analysis use different administrative spatial scales, viz (Fig. 2): Boroughs, PLRs (Planungsräume/ Planning areas), and blocks.  
131 The block scale USTs (Fig. 2b) data (e.g. grass, trees, and shadow fractions, Table S3.1.) involves aggregating the raster data  
132 (Fig. 2). For calculation, pixels centroids within a block boundary but not in a building footprint are used.

133 Input files

134 Input data used in the production of this dataset are listed in Table S3.2.

135 *Table S3.2: Data source used for calculating grass, trees and shadow fraction (Tables S3.3–S3.6).*

|                 |                                                                                                                                                                            | Source                                                 | Resolution |             |
|-----------------|----------------------------------------------------------------------------------------------------------------------------------------------------------------------------|--------------------------------------------------------|------------|-------------|
| Grass fraction  | 1 m land cover data (2021) aggregated to 10 m to compare summer 2022 state using 10 m normalized difference vegetation index (NDVI from Sentinel-2) (Mitraka et al., 2017) | Copernicus Sentinel-2                                  | 10 m       | Summer 2022 |
| Trees fraction  | Same as grass fraction                                                                                                                                                     | Geoportal Berlin (2022a, 2022b), Copernicus Sentinel-2 | 10 m       | Summer 2022 |
| Shadow fraction | Hourly shadows from buildings and trees calculated with UMEP (Lindberg et al., 2018)                                                                                       | Geoportal Berlin (2022a, 2022b), Sentinel-2            | 1 m        | Summer 2022 |

136 **S3.4 Data description**

137 File formats and further meta information for plan area fraction of grass and trees per block are given in Table S3.3, data  
138 attributes in Table S3.4.

139

140 *Table S3.3: Files formats and meta information for the dataset related to grass and trees fraction.*

|                             |                                   |
|-----------------------------|-----------------------------------|
| Filename(s)                 | Grass_Trees_fraction_Block        |
| Coordinate reference system | EPSG 25833; ETRS89 / UTM zone 33N |
| Format, type                | ESRI shapefile; polygons          |
| Resolution                  | Block, vector                     |
| Reference year              | Summer (2022)                     |
| Dataset attributes          | Table 3.4                         |

141



142 **Table S3.4:** Dataset (Table S1.3) attributes.

| Attribute name          | Unit           | Type   | Description                             |
|-------------------------|----------------|--------|-----------------------------------------|
| <i>schl5</i> *          | –              | string | Unique ID of each block                 |
| <i>SHAPE_Length</i>     | m              | float  | Length of the block                     |
| <i>SHAPE_Area</i>       | m <sup>2</sup> | float  | Area of the block                       |
| <i>typklar_ENG</i>      | –              | string | UST of the block                        |
| <i>Typ_Klar_Broader</i> | –              | string | USTs new aggregated classes (Figure S1) |
| <i>Ring</i>             | –              | string | City ring to which the block belongs to |
| <i>fraction_grass</i>   | –              | float  | Fraction of grass per block             |
| <i>fraction_trees</i>   | –              | float  | Fraction of trees per block             |

143

144

File formats and further meta information for shadow fraction are given in Table S3.5, data attributes in Table S3.6.

145

146

**Table S3.3:** Files formats and meta information for the dataset related to grass and trees fraction.

|                             |                                       |
|-----------------------------|---------------------------------------|
| Filename(s)                 | <i>Shadow fraction Block(Sel PLR)</i> |
| Coordinate reference system | EPSG 25833; ETRS89 / UTM zone 33N     |
| Format, type                | ESRI shapefile; polygons              |
| Resolution                  | Block, vector                         |
| Reference year              | Summer (2022)                         |
| Dataset attributes          | Table 3.6                             |

147

**Table S3.6:** Dataset (Table S1.3) attributes.

| Attribute name          | Unit           | Type   | Description                             |
|-------------------------|----------------|--------|-----------------------------------------|
| <i>schl5</i> *          | –              | string | Unique ID of each block                 |
| <i>SHAPE_Length</i>     | m              | float  | Length of the block                     |
| <i>SHAPE_Area</i>       | m <sup>2</sup> | float  | Area of the block                       |
| <i>typklar_ENG</i>      | –              | string | UST of the block                        |
| <i>Typ_Klar_Broader</i> | –              | string | USTs new aggregated classes (Figure S1) |
| <i>Ring</i>             | –              | string | City ring to which the block belongs to |
| <i>fraction_shadow</i>  | –              | float  | Fraction of shadow per block            |

148 **References**

149

Evasys GmbH: Evasys, Evasys GmbH, Konrad-Zuse-Allee 13, 21337 Lüneburg, Germany, 2021.

150

Geoportal Berlin (2022a). Amtliches Liegenschaftskatasterinformationssystem ALKIS Berlin,

151

<https://www.berlin.de/sen/sbw/stadtdaten/geoportal/liegenschaftskataster/>, Download via FIS-Broker:

152

[https://fbinter.stadt-berlin.de/fb?loginkey=showMap&mapId=wmsk\\_alkis@senstadt](https://fbinter.stadt-berlin.de/fb?loginkey=showMap&mapId=wmsk_alkis@senstadt), last accessed: 13/12/2023

153

Geoportal Berlin (2022b). ATKIS DGM - Digitales Geländemodell Berlin.

154

<https://www.berlin.de/sen/sbw/stadtdaten/geoportal/landesvermessung/geotopographie-atkis/dgmdigitale-gelaendemodelle/>; downloaded via FIS-Broker:

155

[https://fbinter.stadtberlin.de/fb?loginkey=showMap&mapId=k\\_dgm1@senstadt](https://fbinter.stadtberlin.de/fb?loginkey=showMap&mapId=k_dgm1@senstadt), last accessed: 13/12/2023

156

Geoportal Berlin (2016). Building Age in Residential Development. <https://www.berlin.de/umweltatlas/en/land-use/building-age/>;

157

downloaded via FIS-Broker: <https://www.berlin.de/umweltatlas/en/land-use/building-age/>, last

158

accessed: 13/06/2023

159

Geoportal Berlin (2021). Impervious Soil Coverage 2021 (Soil Sealing).

160

<https://www.berlin.de/umweltatlas/en/soil/impervious-soil-coverage/2021/summary/>; downloaded via FIS-Broker:

161

[https://fbinter.stadt-](https://fbinter.stadt-berlin.de/fb/index.jsp?Szenario=fb_en&loginkey=zoomStart&mapId=ek01_02versiegelung2021@esenstadt&bbox=367786,5806155,418176,5831378)

162

[berlin.de/fb/index.jsp?Szenario=fb\\_en&loginkey=zoomStart&mapId=ek01\\_02versiegelung2021@esenstadt&bbox=367786,5806155,418176,5831378](https://fbinter.stadt-berlin.de/fb/index.jsp?Szenario=fb_en&loginkey=zoomStart&mapId=ek01_02versiegelung2021@esenstadt&bbox=367786,5806155,418176,5831378), last accessed: 13/06/2023

163

164

Geoportal Berlin (2020). DOM - Digitales Oberflächenmodell Berlin. <https://www.berlin.de/sen/sbw/stadtdaten/geoportal/landesvermessung/geotopographie-atkis/domdigitales-oberflaechenmodell/>;

165

downloaded via FIS-Broker:

166

[https://fbinter.stadtberlin.de/fb?loginkey=showMap&mapId=k\\_dom1@senstadt](https://fbinter.stadtberlin.de/fb?loginkey=showMap&mapId=k_dom1@senstadt), last accessed: 13/12/2023

167

Geoportal Berlin (2021). Urban Structural Density - Floor Space Index (FSI) 2019.

168

<https://www.berlin.de/umweltatlas/en/land-use/urban-structural-density/2019/summary/>;

169

downloaded via FIS-Broker:

170

[https://fbinter.stadt-](https://fbinter.stadt-berlin.de/fb/index.jsp?Szenario=fb_en&loginkey=zoomStart&mapId=ek06_09_01gfz2019@esenstadt&bbox=388091,5818152,394378,5821299)

171

[berlin.de/fb/index.jsp?Szenario=fb\\_en&loginkey=zoomStart&mapId=ek06\\_09\\_01gfz2019@esenstadt&bbox=388091,5818152,394378,5821299](https://fbinter.stadt-berlin.de/fb/index.jsp?Szenario=fb_en&loginkey=zoomStart&mapId=ek06_09_01gfz2019@esenstadt&bbox=388091,5818152,394378,5821299), last accessed: 13/06/2023

172

Landesamt für Bürger- und Ordnungsangelegenheiten: Melderegister der Stadt Berlin, <https://www.berlin.de/labo/>, 2022.

173

Lindberg, F. and Grimmond, C. S. B.: Nature of vegetation and building morphology characteristics across a city: Influence

174

on shadow patterns and mean radiant temperatures in London, *Urban Ecosyst*, 14, 617–634,

175

<https://doi.org/10.1007/s11252-011-0184-5>, 2011.

176

- 177 Marando, F., Heris, M. P., Zulian, G., Udías, A., Mentaschi, L., Chrysoulakis, N., Parastatidis, D., and Maes, J.: Urban heat  
178 island mitigation by green infrastructure in European Functional Urban Areas, *Sustainable Cities and Society*, 77,  
179 103564, <https://doi.org/10.1016/j.scs.2021.103564>, 2022.
- 180 Mitraka, Z., Stagakis, S., Lantzanakis, G., Tzelidi, D., Chrysoulakis, N., Gastellu-Etchegorry, J-P., Lindberg, F.,  
181 Feigenwinter, C., Grimmind, S. (2017) URBANFLUXES Deliverable D8.4 Adaptation to Sentinels methodology and  
182 evaluation report.
- 183 Senatsverwaltung für Stadtentwicklung und Wohnen: Urbane Struktur / Urbane Struktur - Flächentypen differenziert,  
184 <https://www.berlin.de/umweltatlas/en/land-use/urban-structure/>, last accessed: 2/03/2023, 2021.
